# Supplementary material
Source: publisher figshare collection journal article supplement (https://acs.figshare.com/ndownloader/files/3870874)
Supplement: Supplementary file 1 [file 3870874]

# **Metallic BSi<sub>3</sub> Silicene: A Promising High Capacity Anode Material for Lithium-Ion Batteries**

*Xin Tan, Carlos R. Cabrera, Zhongfang Chen\**

*Department of Chemistry, Institute for Functional Nanomaterials, University of Puerto Rico, Rio Piedras Campus, San Juan 00931, Puerto Rico*

---

\* Corresponding author: [zhongfangchen@gmail.com](mailto:zhongfangchen@gmail.com) (Z.C.)

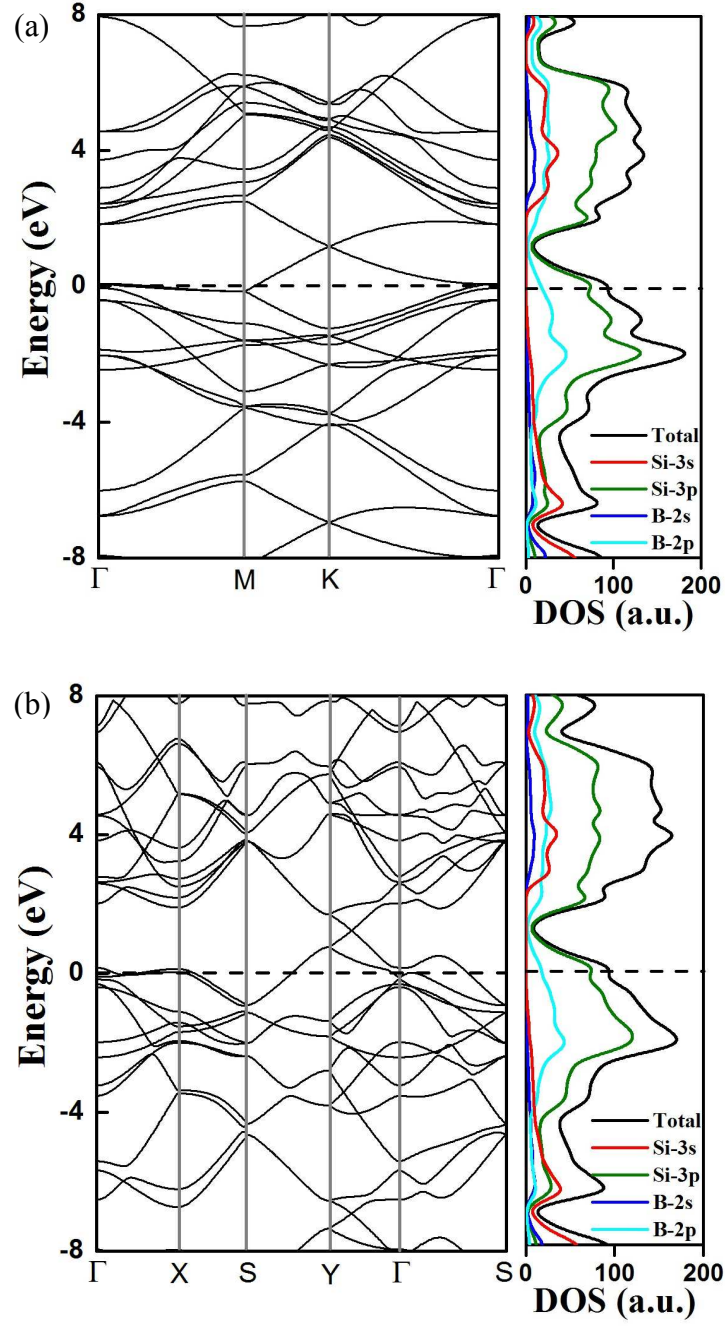

**Figure S1.** Calculated electronic band structure (left) and density of states (DOS, right) of the SL (a) *H*-BSi<sub>3</sub> and (b) *R*-BSi<sub>3</sub>. The DOS is projected on Si-3s, Si-3p, B-2s, B-2p.

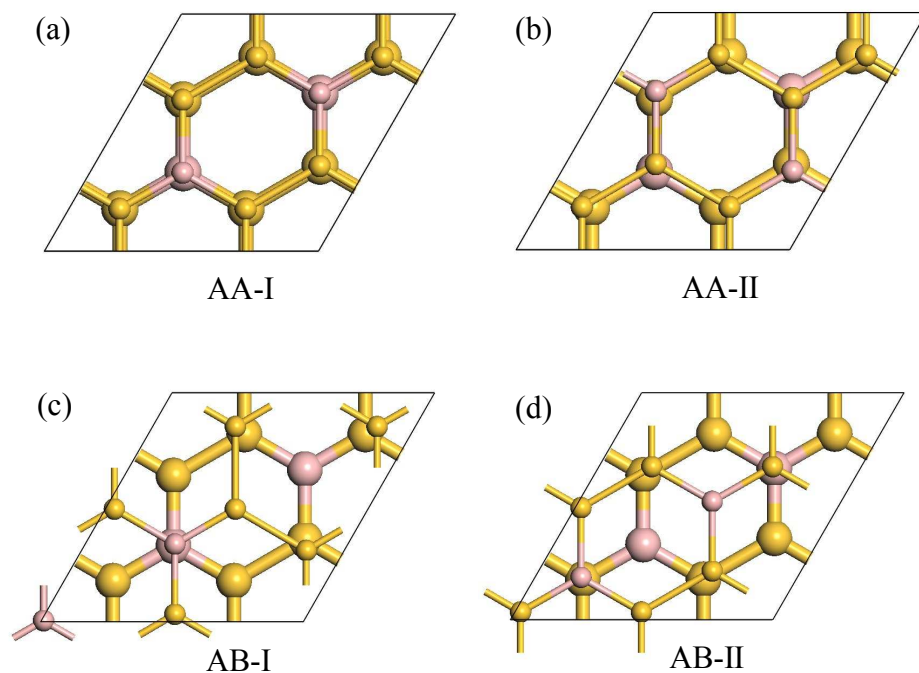

**Figure S2.** The possible atomic arrangements of  $H\text{-BSi}_3$  with (a)-(b) AA and (c)-(d) AB stacking. The yellow and light magenta spheres denote Si and B atoms, the Si/B atoms in the bottom layer and upper layer are represented by large and small spheres, respectively.

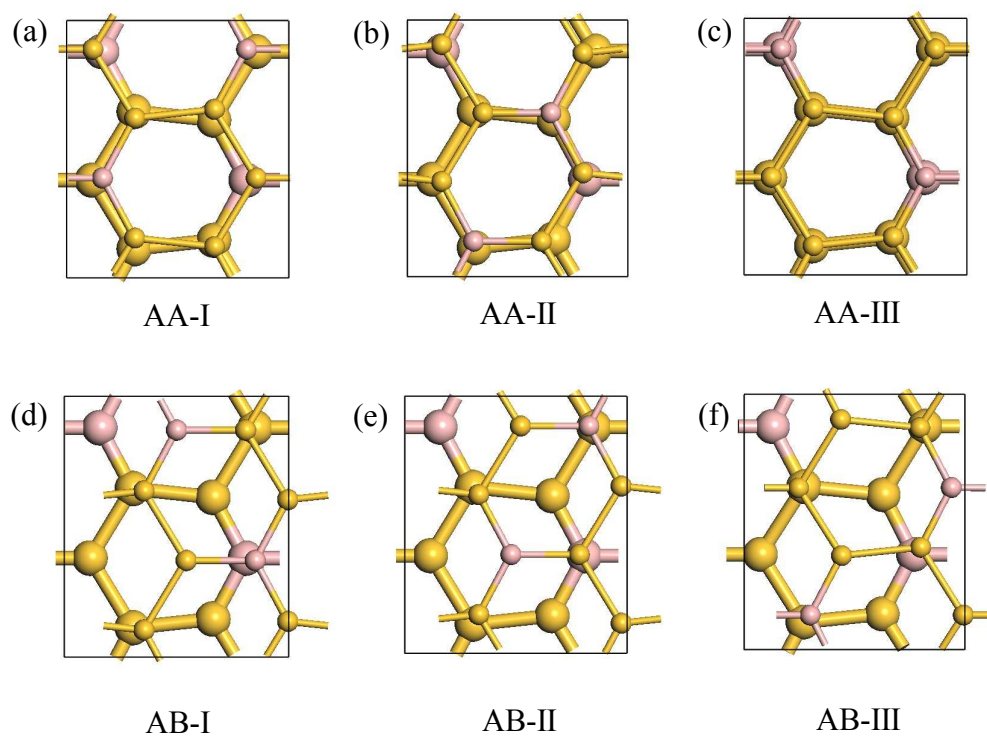

**Figure S3.** The possible atomic arrangements of  $R\text{-BSi}_3$  with (a)-(c) AA and (d)-(f) AB stacking. The yellow and light magenta spheres denote Si and B atoms, the Si/B atoms in the bottom layer and upper layer are represented by large and small spheres, respectively.

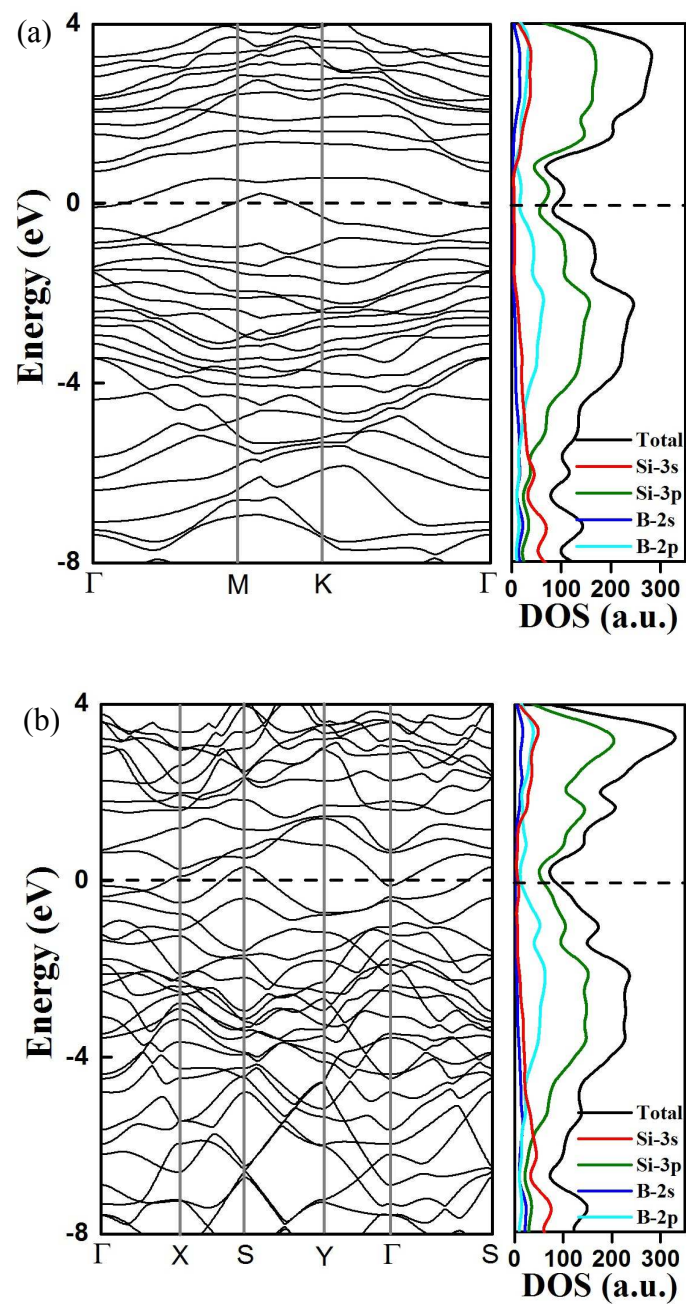

**Figure S4:** Calculated electronic band structure (left) and density of states (DOS, right) of the DL (a) *H*-BSi<sub>3</sub> and (b) *R*-BSi<sub>3</sub>. The DOS is projected on Si-3s, Si-3p, B-2s, B-2p.

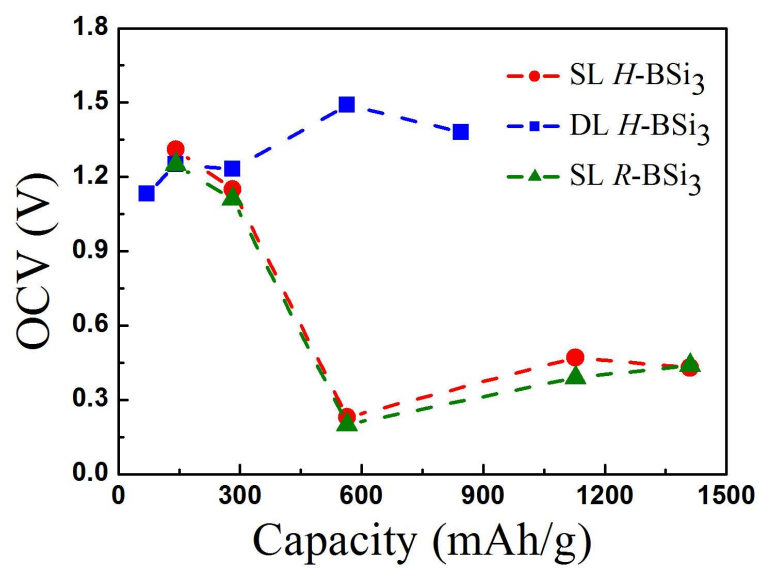

**Figure S5:** OCV as a function of charge capacity of SL  $H\text{-BSi}_3$  (red), DL  $H\text{-BSi}_3$  (blue), and SL  $R\text{-BSi}_3$  (green).

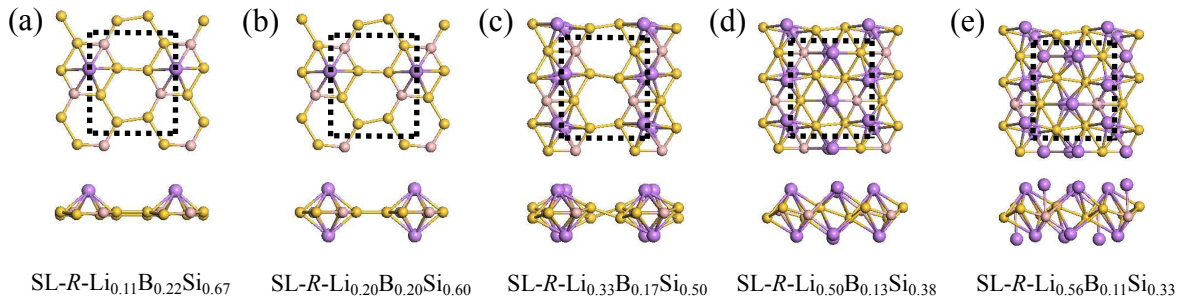

**Figure S6.** (a)-(e) The lowest-energy structures of lithiated SL  $R\text{-BSi}_3$ ,  $\text{SL-R-Li}_x\text{B}_{0.25(1-x)}\text{Si}_{0.75(1-x)}$  with different Li content  $x$ . Top (upper) and side (lower) views are shown separately, and the unit cell is denoted in each top view.

The same as SL  $H\text{-BSi}_3$ , for SL  $R\text{-BSi}_3$ , when the unit cell contains only a single Li atom ( $\text{SL-R-Li}_{0.11}\text{B}_{0.22}\text{Si}_{0.67}$ ), the Li atom adsorbs preferably at  $\text{H}_2$  site (Figure S5a), where the Li resides above the center of the hexagonal ring consisting of six Si and two B atoms. The corresponding adsorption energy (2.96 eV) at  $\text{H}_2$  site is 0.01 and 0.33 eV higher than that at  $\text{H}_1$  and  $\text{T}_\text{B}$  sites, respectively.

Up to 10 Li atoms can be favorably adsorbed in each unit cell of SL  $R\text{-BSi}_3$  (Figure S5b-e), which is the same as the case of the SL  $H\text{-BSi}_3$ . When only two Li atoms are adsorbed in a unit cell, i.e., for  $\text{SL-R-Li}_{0.20}\text{B}_{0.20}\text{Si}_{0.60}$  (Figure S5b), these two Li are reside above and below a single  $\text{H}_2$  site with  $E_{\text{ads}}=2.89$  eV and OCV=1.11 V. As Li content increases, taking  $\text{SL-R-Li}_{0.50}\text{B}_{0.13}\text{Si}_{0.38}$  (Figure S5d) as an example, eight Li gradually cover the two SL  $r\text{-BSi}_3$  surfaces with the adsorption energy and OCVs are 2.25 eV and 0.39 V, respectively. At high Li content ( $\text{SL-R-Li}_{0.56}\text{B}_{0.11}\text{Si}_{0.33}$ ) (Figure S5e), five Li (four at the hollow sites and one at  $\text{T}_\text{B}$  site) are above and five Li are below (four at the hollow sites and one at  $\text{T}_\text{B}$  site) the  $R\text{-BSi}_3$  monolayer, and the

corresponding adsorption energy and OCVs are 2.23 eV and 0.44 V, respectively.

When further increasing the Li content ( $x > 0.56$ ), the Li adsorption energy and OCV decrease significantly. For instance, at the Li content of  $x = 0.6$ , the adsorption energy and OCV are 2.04 eV and -0.62 V, respectively. Thus, we used SL- $R\text{-Li}_{0.56}\text{B}_{0.11}\text{Si}_{0.33}$  to represent the fully lithiated structure of SL  $R\text{-BSi}_3$ .

The charge capacity of the SL  $R\text{-BSi}_3$  (1410 mA·h/g) is the same as that of the SL  $H\text{-BSi}_3$ . Additionally, the average Li adsorption energy decreases with increasing the lithiation ratio, from 2.96 for  $x = 0.11$  to 2.23 eV for  $x = 0.56$  (Figure 3f), and the OCV decrease from 1.25 to 0.44 V (Figure 3g), which are quite similar to the case of SL  $H\text{-BSi}_3$ .



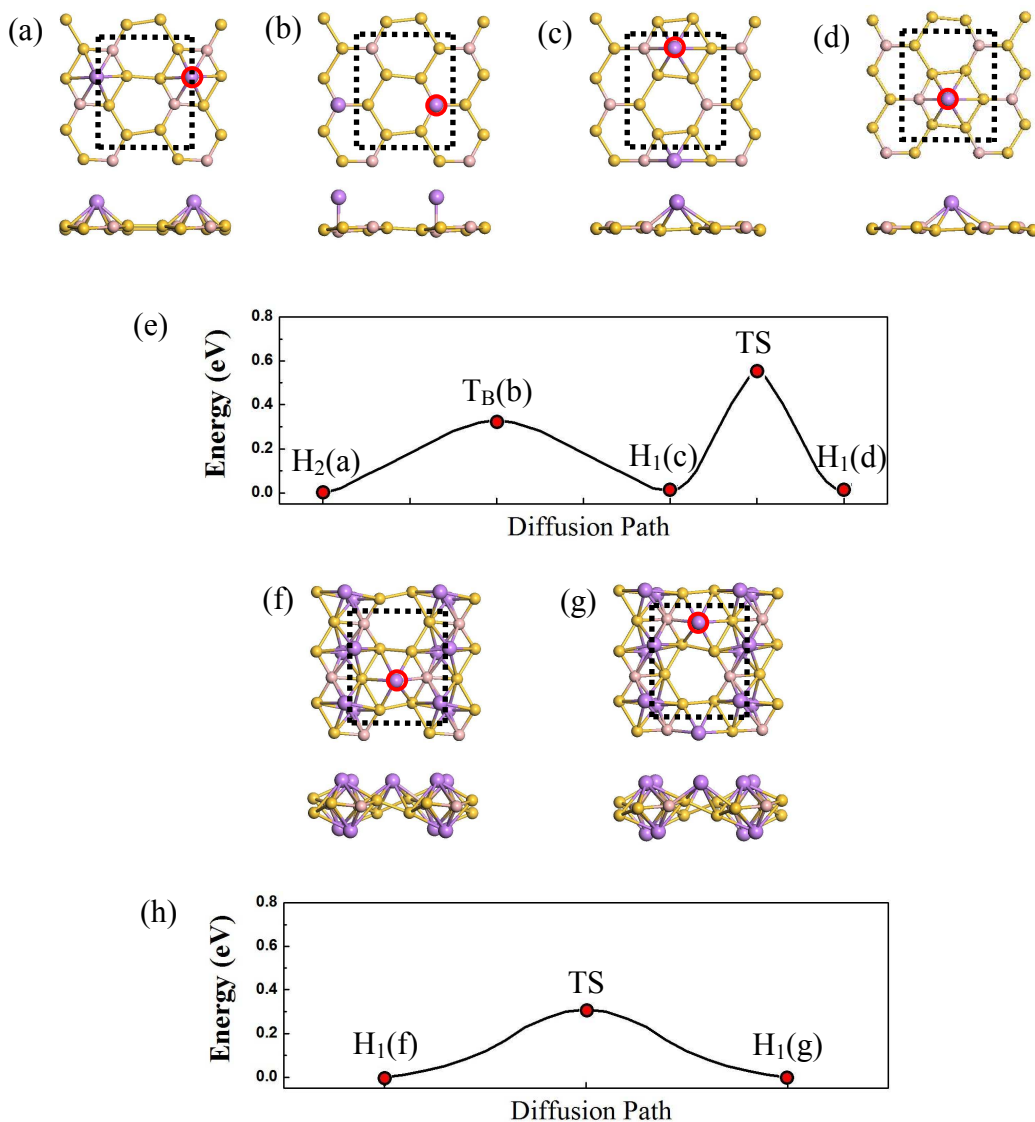

**Figure S7.** The in-plane diffusion of Li (red circle) on SL  $R\text{-BSi}_3$  at low Li content (SL- $R\text{-Li}_{0.11}\text{B}_{0.22}\text{Si}_{0.67}$ , (a)  $\text{H}_2 \rightarrow (\text{b}) \text{T}_\text{B} \rightarrow (\text{c}) \text{H}_1 \rightarrow (\text{d}) \text{H}_1$  sites) and at high Li content (SL- $R\text{-Li}_{0.38}\text{B}_{0.15}\text{Si}_{0.46}$ , (f)  $\text{H}_1 \rightarrow (\text{g}) \text{H}_1$  sites), and the corresponding diffusion pathways and barriers at (e) low and (h) high Li contents, respectively.

To explore the Li diffusion on the SL  $R$ -BSi<sub>3</sub> (Figure S6), we chose the lithium contents of 0.11 and 0.38 as representatives for the low and high lithiation. Both in-plane diffusion and out-plane diffusion were considered.

For the Li in-plane diffusion at low Li content (SL- $R$ -Li<sub>0.11</sub>B<sub>0.22</sub>Si<sub>0.67</sub>) (Figure S6a-e), the energy barriers for H<sub>2</sub>→T<sub>B</sub>→H<sub>1</sub> and H<sub>1</sub>→H<sub>1</sub> are 0.33 and 0.56 eV, respectively, indicating that the Li can easily diffuse from H<sub>2</sub> to H<sub>1</sub> through T<sub>B</sub> site, however, the diffusion from H<sub>1</sub> to the other H<sub>1</sub> is relatively hard. Similar to the case of the SL  $H$ -BSi<sub>3</sub>, the high energy barrier for the diffusion pathway H<sub>1</sub>→H<sub>1</sub> can be significantly decreased from 0.56 to 0.31 eV at high Li content (SL- $R$ -Li<sub>0.38</sub>B<sub>0.15</sub>Si<sub>0.46</sub>) (Figure S6f-h).

For the Li out-plane diffusion, the energy barriers are very high (1.33 and 1.79 eV for H<sub>1</sub> and H<sub>2</sub> sites, respectively), indicating that the out-plane diffusions of Li are energetically prohibited under normal conditions.
